# Supplementary material for: Relationship between Photosynthetic CO2 Assimilation and Chlorophyll Fluorescence for Winter Wheat under Water Stress
Source: MDPI journal article supplement (doi:10.3390/plants12193365), 2023-09-23
Supplement: s1 [file s1]

## **Supporting Information**

### **Relationship between photosynthetic CO<sub>2</sub> assimilation and chlorophyll fluorescence for winter wheat under water stress**

Qianlan Jia<sup>1</sup>, Zhunqiao Liu<sup>2</sup>, Chenhui Guo<sup>1</sup>, Yakai Wang<sup>1</sup>, Jingjing Yang<sup>3,4</sup>, Qiang Yu<sup>2,5</sup>, Jing  
Wang<sup>2</sup>, Fenli Zheng<sup>2,4</sup>, Xiaoliang Lu<sup>2\*</sup>

<sup>1</sup>College of Natural Resources and Environment, Northwest A&F University, Yangling, Shaanxi  
712100, China

<sup>2</sup>State Key Laboratory of Soil Erosion and Dryland Farming on the Loess Plateau, Northwest  
A&F University, Yangling, Shaanxi 712100, China

<sup>3</sup>The Research Center of Soil and Water Conservation and Ecological Environment, Chinese  
Academy of Sciences and Ministry of Education, Yangling, Shaanxi 712100, China

<sup>4</sup>Institute of Soil and Water Conservation, Chinese Academy of Sciences and Ministry of Water  
Resources, Yangling, Shaanxi 712100, China

<sup>5</sup>College of Resources and Environment, University of Chinese Academy of Sciences, Beijing  
100049, China

\*Corresponding to: luxiaoliang@nwafu.edu.cn

### Notes S1. Calculation of $\Phi_P$ , $\Phi_F$ , $\Phi_N$ , $\Phi_D$ , NPQ, $\Phi_{Pmax}$ and $J_{a\_PAM}$

Note that NPQ,  $\Phi_P$  and  $J_{a\_PAM}$  are defined as (obtained from the PAM measurement):

$$NPQ = \frac{(F_m - F_1) - (F_m' - F_1)}{(F_m' - F_1)}$$

$$\Phi_P = \frac{(F_m' - F_1) - (F_t - F_1)}{(F_m' - F_1)}$$

$$J_{a\_PAM} = PAR \times \Phi_P \times 0.84 \times 0.5$$

where  $F_m$  is the maximal fluorescence in the dark;  $F_m'$  is the maximal fluorescence chlorophyll yield from light-adapted state;  $F_t$  is the steady-state fluorescence emission;  $F_1$  is the PSI fluorescence yield; PAR is photochemically active radiation. The fluorescence yields ( $F_o$ ,  $F_m$ ,  $F_m'$ ,  $F_t$ ) were directly measured by the PAM fluorometer.

We have (van der Tol *et al.*, 2014):

$$K_N = \left( \frac{(F_m - F_1) - (F_m' - F_1)}{(F_m' - F_1)} \right) \times (K_F + K_D)$$

$$K_P = \left( \frac{(F_m' - F_1) - (F_t - F_1)}{(F_t - F_1)} \right) \times (K_N + K_F + K_D)$$

where  $K_N$  and  $K_P$  are the rate coefficients of energy-dependent heat dissipation and photochemistry, respectively (van der Tol *et al.*, 2014);  $K_F$  and  $K_D$  are the rate constant for constitutive heat loss and fluorescence emission (van der Tol *et al.*, 2014). In this study,  $K_D$  and  $K_F$  are assumed to be 0.9 and 0.1, respectively (Liu *et al.*, 2022). Note that NPQ should be equal to  $K_N$  because  $NPQ = K_N / (K_F + K_D)$ , and  $K_F + K_D = 1$ .

Thus:

$$\Phi_P = \frac{K_P}{K_D + K_F + K_N + K_P}$$

$$\Phi_F = \frac{K_F}{K_D + K_F + K_N + K_P}$$

$$\Phi_N = \frac{K_N}{K_D + K_F + K_N + K_P}$$

$$\Phi_D = \frac{K_D}{K_D + K_F + K_N + K_P}$$

where the quantum yields ( $\Phi$ ) for the four different pathways: fluorescence ( $\Phi_F$ ), photosynthesis ( $\Phi_P$ ), regulated heat dissipation ( $\Phi_N$ ), and basal heat dissipation ( $\Phi_D$ ) are obtained from the PAM measurement. It is noteworthy that  $\Phi_P$ ,  $\Phi_F$ ,  $\Phi_N$  and  $\Phi_D$  were also corrected for PSI fluorescence.

**Figure S1. Variations in  $\beta_S$  and  $\beta_B$  for the water stress (WS, diamonds) treatments under 12 days of progressive drought stress. The red diamonds represent  $\beta_S$  in the WS treatment, and the black diamonds indicate  $\beta_B$  in the WS treatment.  $\beta_S$  and  $\beta_B$  are the normalized soil moisture dependent stress functions describing the effect of water stress in the modified Ball–Woodrow–Berry model.**

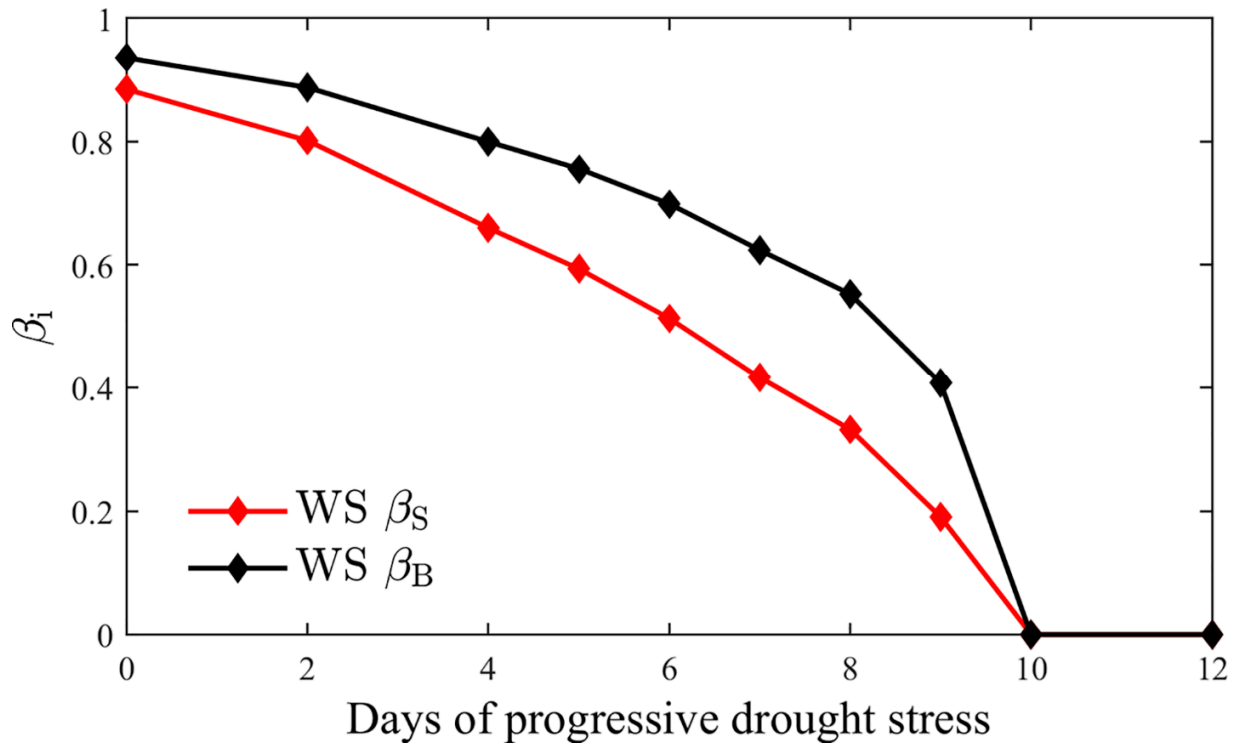

**Figure S2. Average absorbed photosynthetically active radiation (APAR,  $\mu\text{mol m}^{-2} \text{s}^{-1}$ ) under changing light intensity over the duration of the drought.** The numbers in the upper right corner of each plot are the number of days after withholding water. The soil water content (SWC, %) is also indicated in each panel. The solid lines represent the mean, and the shaded areas  $\pm$  one standard deviation.

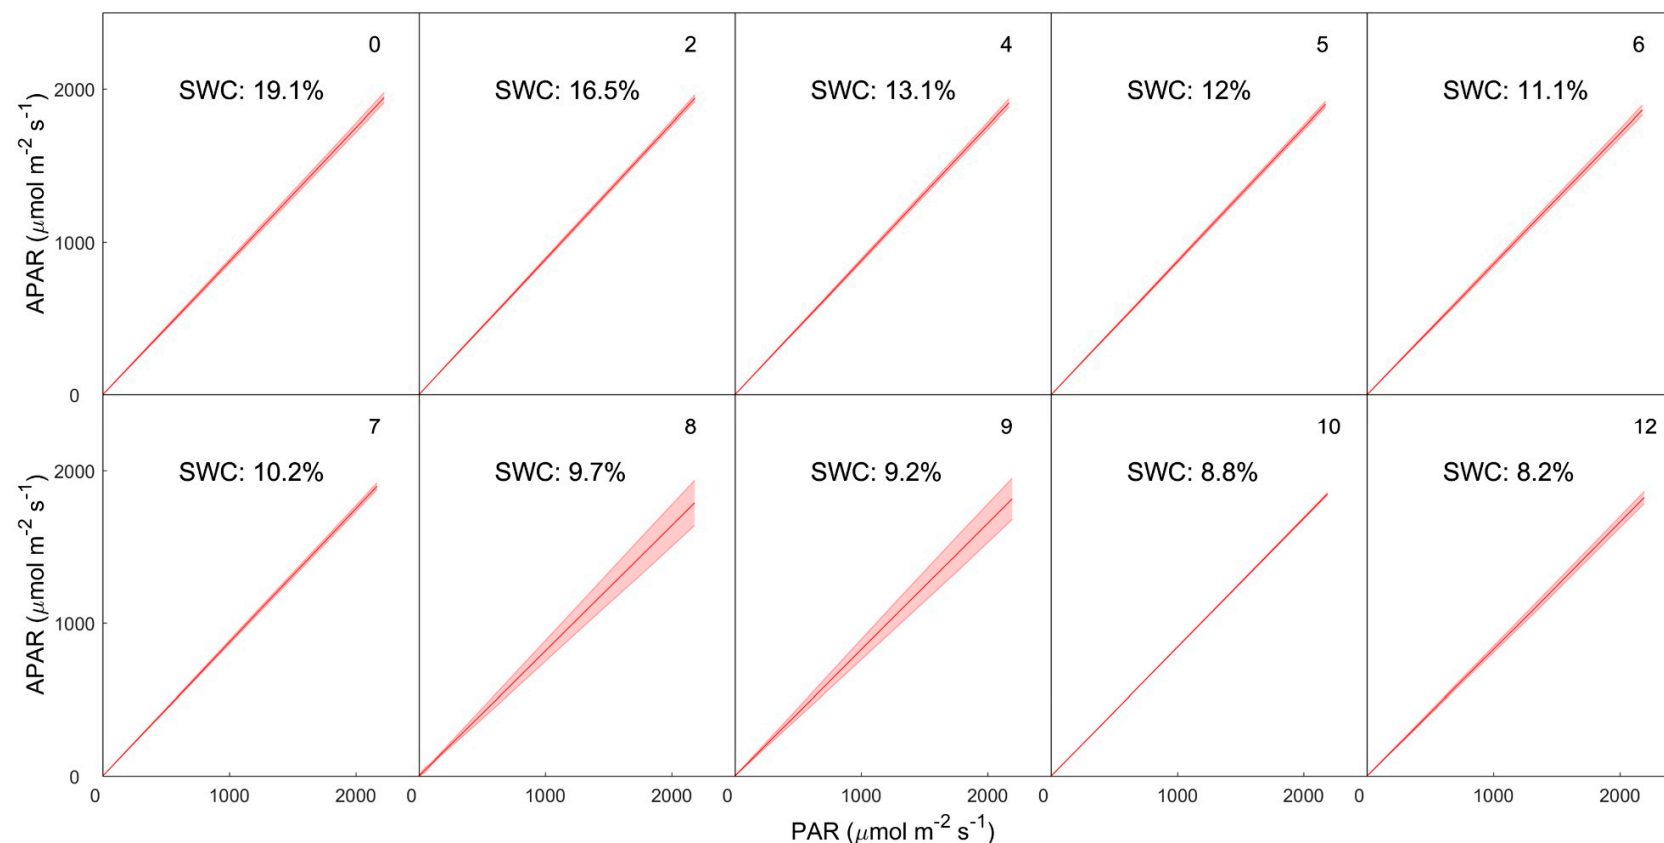

**Figure S3. The responses of full-band chlorophyll fluorescence emission at the photosystem level ( $\text{ChlF}_{\text{P\_F}}$ ,  $\mu\text{mol m}^{-2} \text{s}^{-1}$ ) to changing light intensity during the period between 14 and 28 days (WS14 to WS28) after withholding water. Numbers in the upper right corner represent days of progressive drought stress. The soil water content (SWC, %) is also given in each panel. The solid lines represent the mean, and the shaded areas  $\pm$  one standard deviation, of four replicates.**

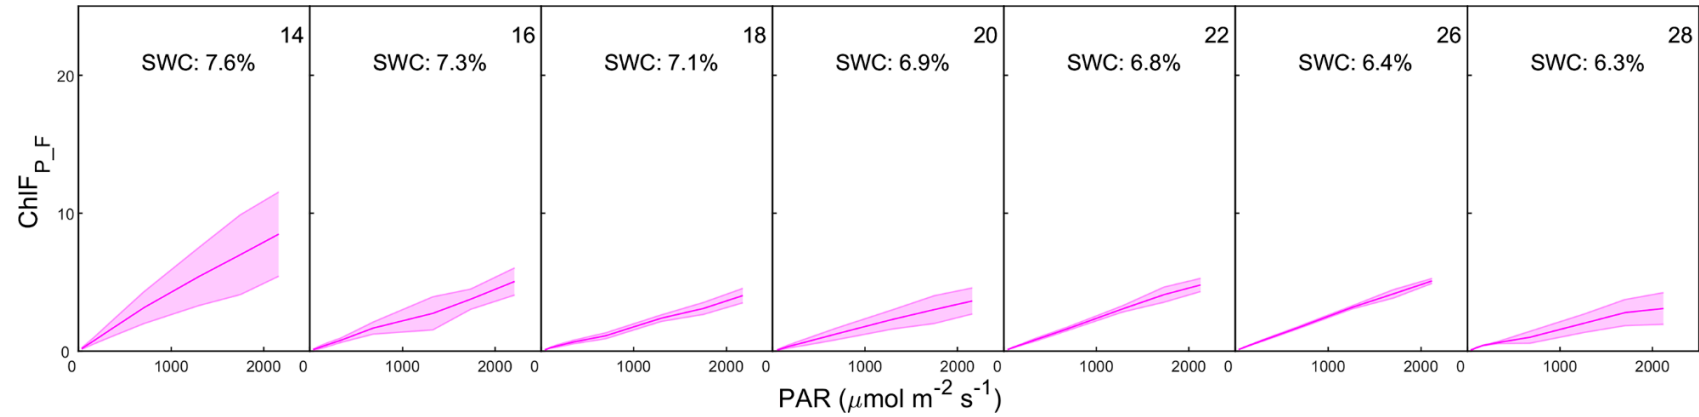

**Table S1. List of retrieved parameters, their initial values, lower boundaries (LB), upper boundaries (UB) and constraints.**

|                | <b>Initial values</b> | <b>LB</b> | <b>UB</b> | <b>Constraints</b> |
|----------------|-----------------------|-----------|-----------|--------------------|
| g              | -22030                | -500000   | 0         | NPQ                |
| h              | 1.142                 | 0         | 5         | NPQ                |
| j              | 2.539                 | 0         | 5         | NPQ                |
| k              | -88.11                | -100      | 0         | $\Phi_P$           |
| l              | 1.027                 | 0         | 5         | $\Phi_P$           |
| m              | 0.489                 | 0         | 5         | $\Phi_P$           |
| q <sub>B</sub> | 0.5                   | 0         | 3         | $V_{\text{cmax}}$  |
| q <sub>S</sub> | 0.5                   | 0         | 3         | G <sub>S</sub>     |

### **Supplemental reference:**

**Liu ZQ, Zhao F, Liu XJ, Yu Q, Wang YF, Peng XB, Cai HJ, Lu XL.** 2022. Direct estimation of photosynthetic CO<sub>2</sub> assimilation from solar-induced chlorophyll fluorescence (SIF). *Remote Sensing of Environment* 271, 112893.

**van der Tol C, Berry J, Campbell P, Rascher U.** 2014. Models of fluorescence and photosynthesis for interpreting measurements of solar-induced chlorophyll fluorescence. *Journal of Geophysical Research: Biogeosciences* 119, 2312-2327.
